# Supplementary material for: Structural disassembly, dangling bond and hydrogen storage of NinSn (n=2-10) clusters
Source: Research Square preprint supplement (doi:10.21203/rs.3.rs-5906730/v1), 2025-04-29
Supplement: Supplementary file 1 [file 20b6c63cf6dfc8467a221457.pdf]

## ***Supporting Information***

# **Structural disassembly, dangling bond and hydrogen storage of $\text{Ni}_n\text{S}_n$ ( $n=2-10$ ) clusters**

Weide Liu<sup>1</sup>, Fenfa Zhang<sup>1</sup>, Bowei Jin<sup>1</sup>, Xuezhou Lu<sup>1</sup>, Zhengyang Ding<sup>1</sup>, Xiao Wang<sup>1</sup>,  
and Meng Zhang<sup>1\*</sup>

### AUTHOR INFORMATION

1 School of Physics, East China University of Science and Technology, Shanghai  
200237, China

Corresponding Authors

\*E-mail: mzhang@ecust.edu.cn (M.Z.)

1. Figure S1. Lowest-energy structures and low-lying isomers with relative energies (in eV) of  $\text{Ni}_n\text{S}_n$  ( $n=1-10$ ) clusters. Yellow and blue circles represent nickel and sulphur atoms, respectively. The symmetry type is given at 0.1 Å tolerances.
2. Figure S2. The shortest and average Ni-S bond lengths in Angstroms of the  $\text{Ni}_n\text{S}_n$  clusters ( $n=1-10$ ) and  $\beta$ -NiS bulk phase for the lowest-energy structures.
3. Table S1. Calculated bond distance  $d$  (Å) and vibrational frequency  $\omega_e$  ( $\text{cm}^{-1}$ ) of the  $\text{S}_2$  and  $\text{Ni}_2$  dimers optimized using different density functional methods.
4. Table S2. The x,y,z coordinates of the proposed structures of the neutral  $\text{Ni}_n\text{S}_n$  ( $n=1-10$ ) clusters collected in Figure S1.
5. Table S3. The x,y,z coordinates of the proposed structures of the  $\text{Ni}_4\text{S}_4$  cluster with adsorbed hydrogen atoms.

Figure S1. Lowest-energy structures and low-lying isomers with relative energies (in eV) of  $\text{Ni}_n\text{S}_n$  ( $n=1-10$ ) clusters. Yellow and blue circles represent nickel and sulphur atoms, respectively. The symmetry is given at 0.1 Å tolerances.

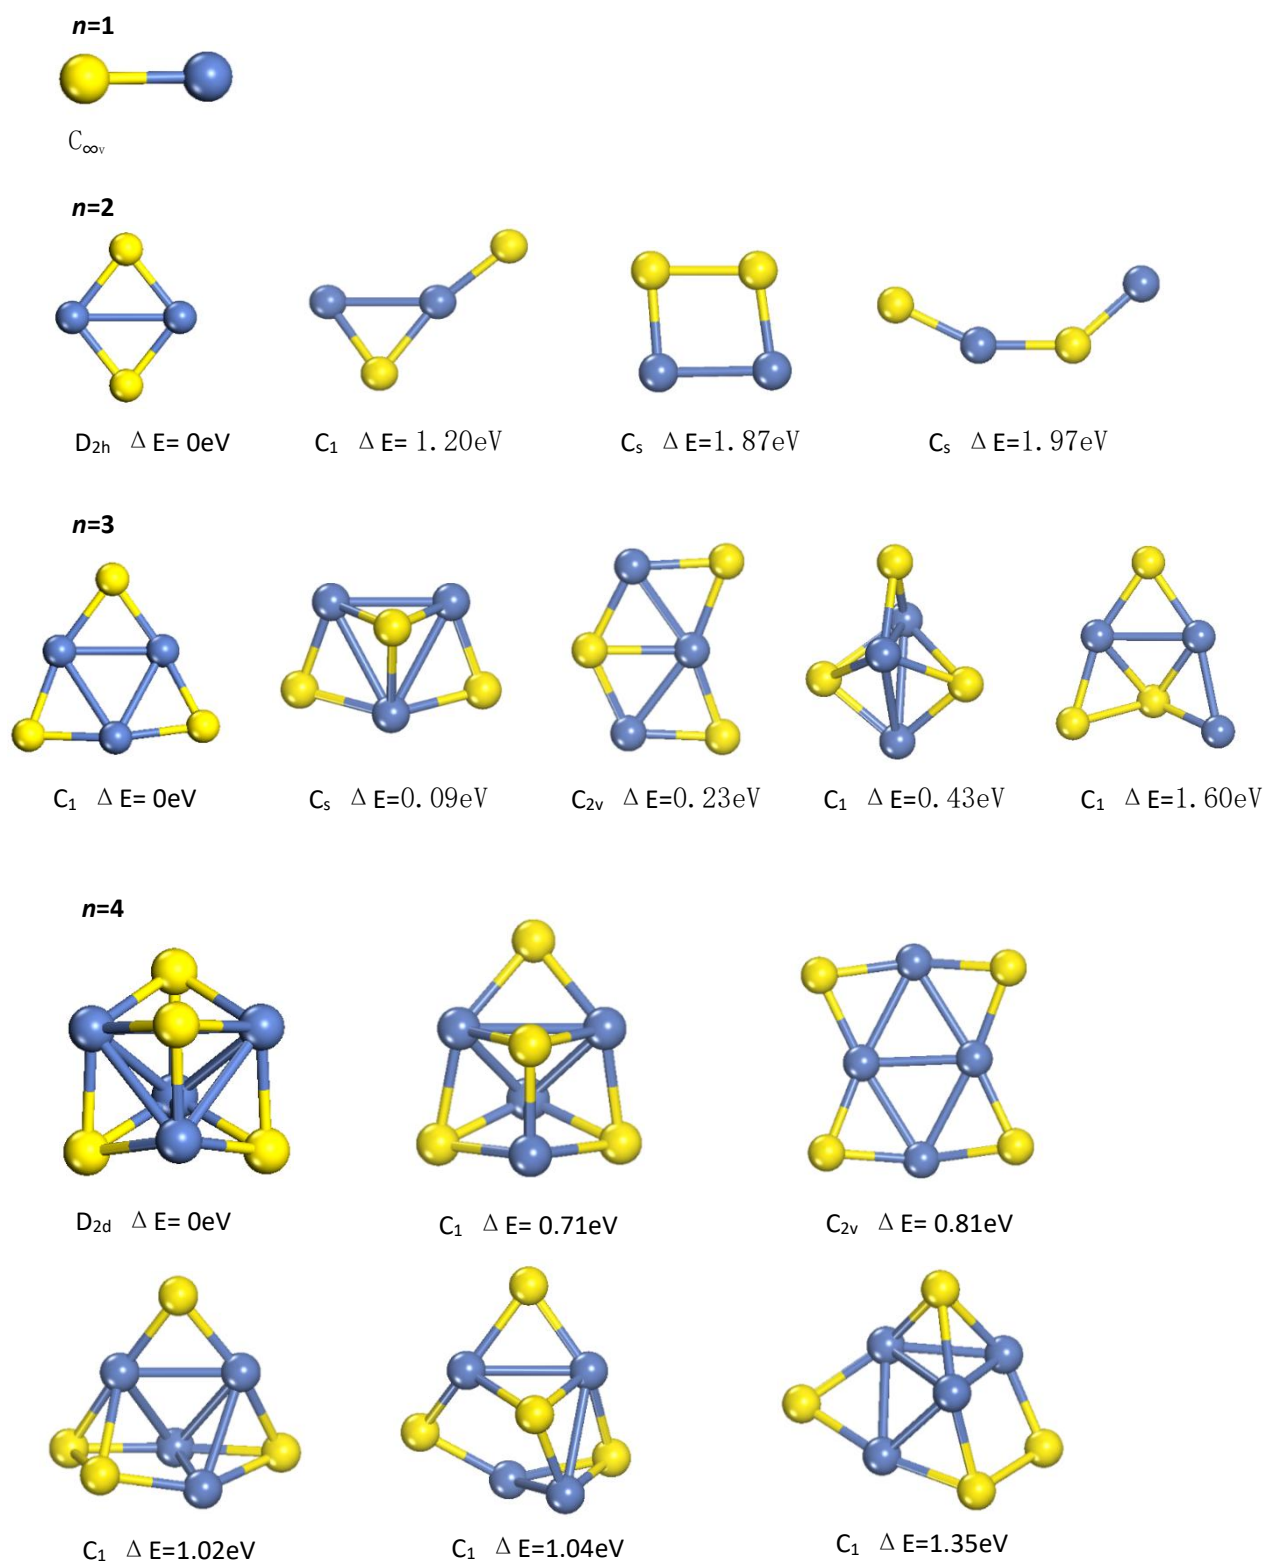

***n=5***

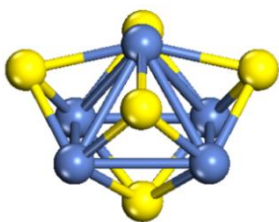

$C_{4v}$   $\Delta E = 0\text{eV}$

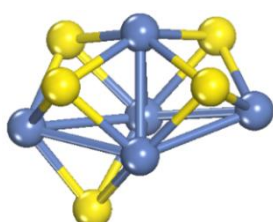

$C_s$   $\Delta E = 1.05\text{eV}$

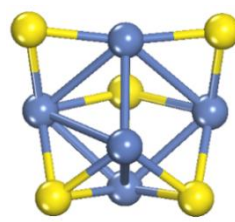

$C_s$   $\Delta E = 1.16\text{eV}$

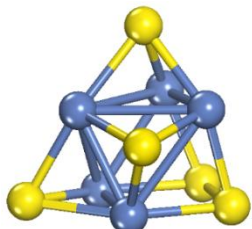

$C_1$   $\Delta E = 1.31\text{eV}$

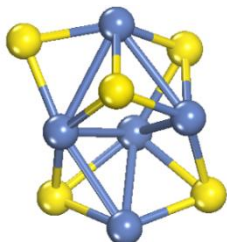

$C_1$   $\Delta E = 1.34\text{eV}$

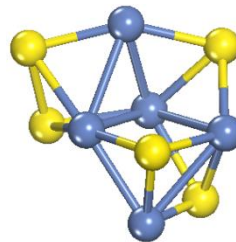

$C_1$   $\Delta E = 1.44\text{eV}$

***n=6***

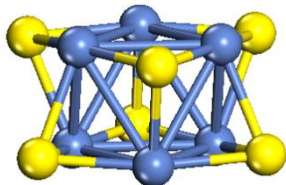

$D_{3d}$   $\Delta E = 0\text{eV}$

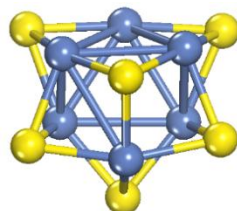

$C_s$   $\Delta E = 0.37\text{eV}$

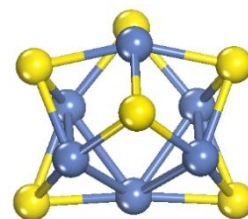

$C_{2v}$   $\Delta E = 0.42\text{eV}$

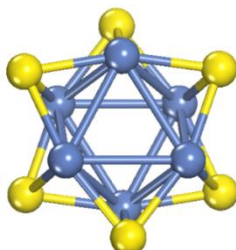

$C_{2h}$   $\Delta E = 0.47\text{eV}$

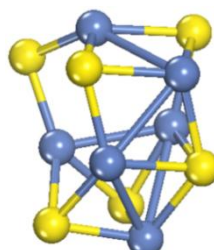

$C_1$   $\Delta E = 0.83\text{eV}$

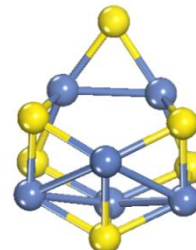

$C_s$   $\Delta E = 0.88\text{eV}$

***n=7***

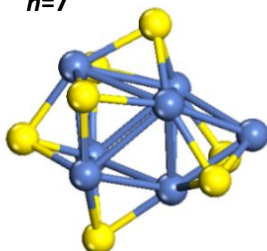

$C_s$   $\Delta E = 0\text{eV}$

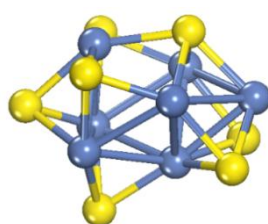

$C_s$   $\Delta E = 0.02\text{eV}$

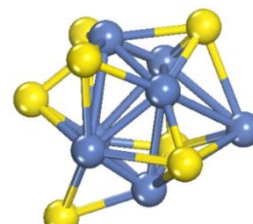

$C_1$   $\Delta E = 0.03\text{eV}$

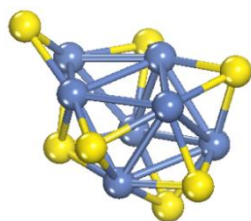

$C_1$   $\Delta E = 0.40\text{eV}$

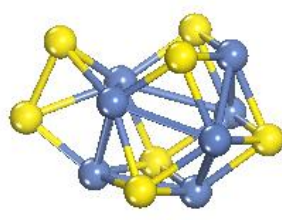

$C_1$   $\Delta E = 0.67\text{eV}$

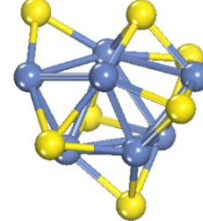

$C_1$   $\Delta E = 0.72\text{eV}$

**$n=8$**

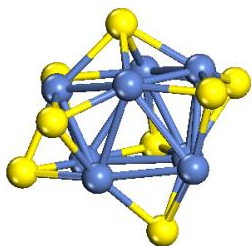

$C_s \Delta E= 0\text{eV}$

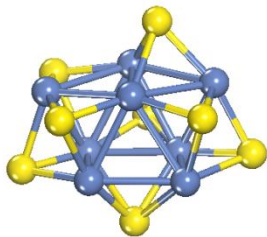

$C_1 \Delta E= 0.04\text{eV}$

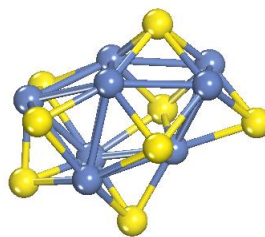

$C_s \Delta E= 0.09\text{eV}$

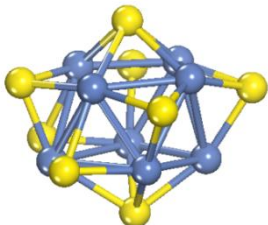

$C_s \Delta E= 0.17\text{eV}$

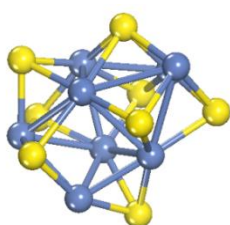

$C_1 \Delta E= 0.36\text{eV}$

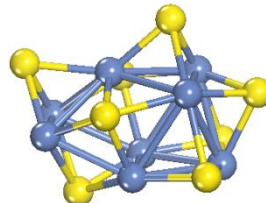

$C_s \Delta E= 0.38\text{eV}$

**$n=9$**

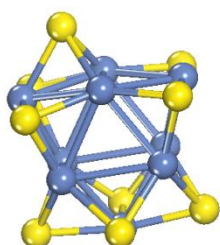

$C_s \Delta E= 0\text{eV}$

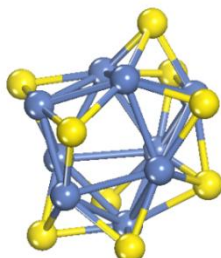

$C_s \Delta E= 0.23\text{eV}$

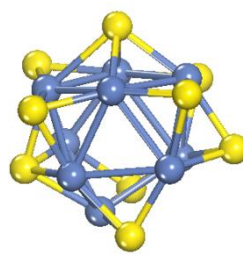

$C_1 \Delta E= 0.34\text{eV}$

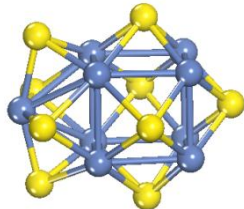

$C_{4v} \Delta E= 0.36\text{eV}$

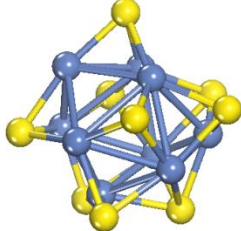

$C_s \Delta E= 0.48\text{eV}$

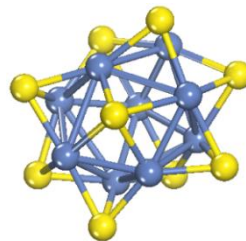

$C_s \Delta E= 0.49\text{eV}$

**$n=10$**

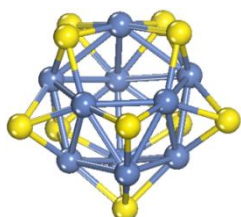

$C_s \Delta E= 0\text{eV}$

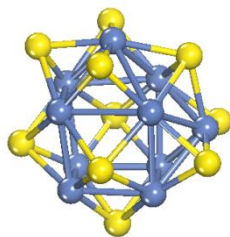

$C_s \Delta E= 0.07\text{eV}$

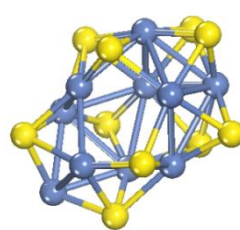

$C_1 \Delta E= 0.39\text{eV}$

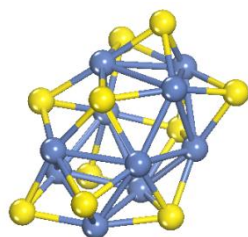

$C_1 \Delta E= 0.48\text{eV}$

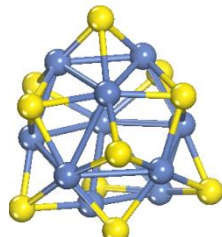

$C_1 \Delta E= 0.49\text{eV}$

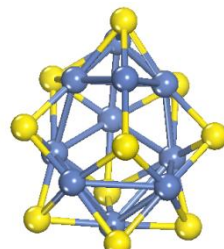

$C_s \Delta E= 0.50\text{eV}$

Figure S2. The shortest and average Ni-S bond lengths in Angstroms of the  $\text{Ni}_n\text{S}_n$  clusters ( $n=1-10$ ) and  $\beta$ -NiS bulk phase for the lowest-energy structures.

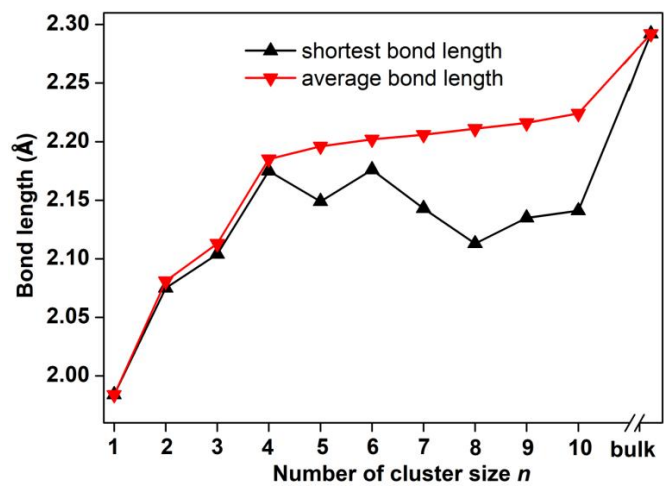

Table S1. Calculated bond distance  $d$  (Å) and vibrational frequency  $\omega_e$  (cm<sup>-1</sup>) of the S<sub>2</sub> and Ni<sub>2</sub> dimers optimized using different density functional methods. a) Ref. [70-72].

| methods             | S <sub>2</sub> |            | Ni <sub>2</sub> |            |
|---------------------|----------------|------------|-----------------|------------|
|                     | $d$            | $\omega_e$ | $d$             | $\omega_e$ |
| BP                  | 1.937          | 691.1      | 2.102           | 333.8      |
| BLYP                | 1.958          | 656.6      | 2.144           | 334.1      |
| PW91                | 1.937          | 690.6      | 2.096           | 338.9      |
| PBE                 | 1.936          | 694.6      | 2.112           | 333.2      |
| expt. <sup>a)</sup> | 1.89           | 725.65     | 2.15            | 325        |

Table S2. The x,y,z coordinates of the proposed structures of the neutral Ni<sub>n</sub>S<sub>n</sub> (n=1-10) clusters collected in Figure S1.

**Coordinates (Angstroms) of Ni<sub>n</sub>S<sub>n</sub> (n=1-10) Clusters**

| System     | ATOM | X         | Y         | Z         |
|------------|------|-----------|-----------|-----------|
| -----      |      |           |           |           |
| Isomer 1-1 |      |           |           |           |
| 1          | Ni   | 9.265021  | 14.109239 | 10.805929 |
| 2          | S    | 7.616033  | 13.515477 | 11.735125 |
| Isomer 2-1 |      |           |           |           |
| 1          | Ni   | 9.154717  | 13.361306 | 11.045676 |
| 2          | S    | 7.465848  | 14.414645 | 11.688243 |
| 3          | Ni   | 8.594415  | 14.106393 | 13.402159 |
| 4          | S    | 10.283316 | 13.053040 | 12.759619 |
| Isomer 2-2 |      |           |           |           |
| 1          | Ni   | 8.969493  | 13.637448 | 11.871735 |
| 2          | S    | 7.244997  | 14.204939 | 11.043060 |
| 3          | Ni   | 11.249345 | 14.189519 | 11.789014 |
| 4          | S    | 10.505717 | 12.552311 | 12.801612 |
| Isomer 2-3 |      |           |           |           |
| 1          | S    | -5.981820 | 3.391323  | -0.015709 |
| 2          | Ni   | -4.601389 | 1.855476  | 0.014455  |
| 3          | S    | -4.267577 | 4.710117  | -0.022573 |
| 4          | Ni   | -2.829480 | 3.264333  | 0.017132  |
| Isomer 2-4 |      |           |           |           |
| 1          | S    | -5.585594 | 3.712296  | -0.115136 |
| 2          | Ni   | -4.154350 | 2.343397  | 0.054792  |
| 3          | S    | -2.684746 | 1.004953  | 0.214320  |
| 4          | Ni   | -6.988504 | 5.057695  | -0.280448 |
| Isomer 3-1 |      |           |           |           |
| 1          | Ni   | 9.002523  | 13.232218 | 11.648298 |
| 2          | S    | 7.241735  | 14.291349 | 11.180035 |
| 3          | Ni   | 8.939850  | 12.284323 | 13.917584 |
| 4          | S    | 10.674128 | 12.708754 | 12.802974 |
| 5          | Ni   | 6.818710  | 12.857800 | 12.702619 |
| 6          | S    | 7.009376  | 11.534940 | 14.363865 |
| Isomer 3-2 |      |           |           |           |
| 1          | Ni   | 9.672146  | 12.872057 | 11.385737 |
| 2          | S    | 7.978020  | 14.506128 | 11.618272 |
| 3          | Ni   | 8.724423  | 14.131720 | 13.522622 |
| 4          | S    | 9.373399  | 12.171018 | 13.357294 |

|            |    |           |           |           |
|------------|----|-----------|-----------|-----------|
| 5          | Ni | 9.801164  | 15.502029 | 11.713529 |
| 6          | S  | 11.068568 | 14.263712 | 10.638397 |
| Isomer 3-3 |    |           |           |           |
| 1          | Ni | 8.973648  | 13.385044 | 11.801304 |
| 2          | S  | 7.219590  | 14.424934 | 11.290619 |
| 3          | Ni | 10.925749 | 14.728261 | 11.590347 |
| 4          | S  | 10.805161 | 12.910542 | 12.729288 |
| 5          | Ni | 8.936567  | 15.354653 | 10.441845 |
| 6          | S  | 10.667970 | 16.599383 | 10.608993 |
| Isomer 3-4 |    |           |           |           |
| 1          | Ni | 9.045722  | 13.102880 | 11.102432 |
| 2          | S  | 7.747792  | 14.836127 | 11.666720 |
| 3          | Ni | 8.410171  | 13.569190 | 13.392359 |
| 4          | S  | 10.529530 | 13.711327 | 12.707851 |
| 5          | Ni | 9.776658  | 15.442850 | 11.730438 |
| 6          | S  | 7.765795  | 11.843304 | 12.233677 |
| Isomer 3-5 |    |           |           |           |
| 1          | Ni | 8.879500  | 13.326354 | 11.986141 |
| 2          | S  | 7.491670  | 14.506874 | 10.843580 |
| 3          | Ni | 11.039060 | 14.306672 | 11.585453 |
| 4          | S  | 10.693076 | 12.606131 | 12.821852 |
| 5          | Ni | 10.530130 | 16.009144 | 10.126948 |
| 6          | S  | 9.242562  | 15.518421 | 11.679428 |
| Isomer 4-1 |    |           |           |           |
| 1          | Ni | 9.271726  | 13.837066 | 11.542523 |
| 2          | S  | 7.127505  | 13.447304 | 11.569499 |
| 3          | Ni | 7.550419  | 14.846732 | 13.197053 |
| 4          | S  | 9.673580  | 15.329356 | 13.092387 |
| 5          | Ni | 8.067293  | 12.010269 | 12.932587 |
| 6          | S  | 7.344248  | 13.195097 | 14.623835 |
| 7          | Ni | 9.474124  | 13.604035 | 14.418271 |
| 8          | S  | 10.217345 | 12.316953 | 12.804874 |
| Isomer 4-2 |    |           |           |           |
| 1          | Ni | 8.446629  | 13.379197 | 11.209631 |
| 2          | S  | 8.264735  | 15.601860 | 11.073540 |
| 3          | Ni | 10.062010 | 13.354503 | 13.523576 |
| 4          | S  | 10.671989 | 13.304243 | 11.377897 |
| 5          | Ni | 10.232574 | 15.341030 | 11.889435 |
| 6          | S  | 7.933756  | 13.124531 | 13.315334 |
| 7          | Ni | 8.245392  | 15.302671 | 13.273473 |
| 8          | S  | 9.587375  | 14.915034 | 14.923317 |

|            |    |           |           |           |
|------------|----|-----------|-----------|-----------|
| Isomer 4-3 |    |           |           |           |
| 1          | Ni | 11.853375 | 8.850724  | 7.983161  |
| 2          | Ni | 8.846681  | 11.848623 | 7.985096  |
| 3          | Ni | 11.203001 | 11.201972 | 7.806799  |
| 4          | Ni | 9.487590  | 9.487539  | 7.800213  |
| 5          | S  | 13.131903 | 10.440585 | 7.538804  |
| 6          | S  | 7.561041  | 10.269812 | 7.537853  |
| 7          | S  | 10.440016 | 13.143266 | 7.612136  |
| 8          | S  | 10.271252 | 7.547095  | 7.610264  |
| Isomer 4-4 |    |           |           |           |
| 1          | Ni | 9.152024  | 14.277160 | 11.746035 |
| 2          | S  | 8.410521  | 12.345540 | 10.985549 |
| 3          | Ni | 8.445030  | 14.563885 | 14.050920 |
| 4          | S  | 9.304220  | 16.086344 | 12.845714 |
| 5          | Ni | 7.260980  | 12.584226 | 12.873452 |
| 6          | S  | 7.268770  | 12.955469 | 15.034045 |
| 7          | Ni | 9.505444  | 12.140177 | 12.921479 |
| 8          | S  | 9.468997  | 12.784989 | 14.962614 |
| Isomer 4-5 |    |           |           |           |
| 1          | Ni | 8.782587  | 13.223548 | 11.111836 |
| 2          | S  | 6.976934  | 14.318655 | 11.207367 |
| 3          | Ni | 10.714601 | 14.545118 | 12.017703 |
| 4          | S  | 10.258474 | 12.512858 | 12.502267 |
| 5          | Ni | 9.933137  | 16.068862 | 10.015749 |
| 6          | S  | 10.020706 | 16.654326 | 12.094452 |
| 7          | Ni | 8.023160  | 16.107203 | 11.466404 |
| 8          | S  | 10.430170 | 14.015490 | 9.854366  |
| Isomer 4-6 |    |           |           |           |
| 1          | Ni | 8.937704  | 12.665114 | 11.075589 |
| 2          | S  | 7.319165  | 14.070920 | 10.646753 |
| 3          | Ni | 9.106471  | 12.865439 | 13.784008 |
| 4          | S  | 10.708221 | 12.331132 | 12.427502 |
| 5          | Ni | 7.072386  | 13.007536 | 12.551992 |
| 6          | S  | 7.266351  | 12.071383 | 14.449687 |
| 7          | Ni | 10.018357 | 14.397428 | 12.107482 |
| 8          | S  | 8.640669  | 15.708312 | 11.196247 |
| Isomer 5-1 |    |           |           |           |
| 1          | Ni | 7.490401  | 8.557174  | 9.169749  |
| 2          | Ni | 9.507122  | 9.851507  | 10.369447 |
| 3          | Ni | 7.496244  | 11.136109 | 9.149750  |
| 4          | Ni | 7.603523  | 11.156878 | 11.725510 |

|            |    |           |           |           |
|------------|----|-----------|-----------|-----------|
| 5          | Ni | 7.595047  | 8.579288  | 11.746546 |
| 6          | S  | 6.312943  | 9.860846  | 10.497936 |
| 7          | S  | 9.081958  | 9.870095  | 12.608221 |
| 8          | S  | 8.900211  | 9.835485  | 8.171858  |
| 9          | S  | 8.984451  | 7.631756  | 10.408887 |
| 10         | S  | 8.996662  | 12.074651 | 10.371825 |
| Isomer 5-2 |    |           |           |           |
| 1          | Ni | 10.014593 | 8.294615  | 10.550362 |
| 2          | Ni | 7.839748  | 8.365509  | 8.352968  |
| 3          | Ni | 10.430896 | 8.998064  | 8.147954  |
| 4          | Ni | 8.972805  | 10.403750 | 9.614017  |
| 5          | S  | 10.162656 | 10.403157 | 11.471121 |
| 6          | S  | 9.500731  | 7.069993  | 8.749172  |
| 7          | S  | 8.654583  | 10.143542 | 7.411918  |
| 8          | S  | 7.838787  | 8.678129  | 10.461986 |
| 9          | Ni | 11.629962 | 10.552165 | 9.947356  |
| 10         | S  | 12.072976 | 8.520173  | 9.548689  |
| Isomer 5-3 |    |           |           |           |
| 1          | Ni | 9.839328  | 9.639813  | 11.616072 |
| 2          | Ni | 10.107584 | 9.886764  | 8.010990  |
| 3          | Ni | 8.301740  | 9.141860  | 9.541453  |
| 4          | Ni | 10.876309 | 8.130399  | 9.837928  |
| 5          | Ni | 9.574923  | 11.584778 | 9.972044  |
| 6          | S  | 11.287936 | 10.245149 | 10.113688 |
| 7          | S  | 7.997158  | 10.631642 | 11.078641 |
| 8          | S  | 9.086263  | 7.725566  | 10.969335 |
| 9          | S  | 10.970570 | 7.970698  | 7.755477  |
| 10         | S  | 9.469467  | 11.899029 | 7.909486  |
| Isomer 5-4 |    |           |           |           |
| 1          | Ni | 9.954314  | 10.943602 | 8.089494  |
| 2          | Ni | 9.134383  | 10.905280 | 10.426262 |
| 3          | Ni | 8.384251  | 8.672233  | 10.421076 |
| 4          | Ni | 9.133725  | 8.773255  | 7.822693  |
| 5          | S  | 7.299303  | 7.925373  | 8.695804  |
| 6          | S  | 10.344827 | 8.179882  | 9.576855  |
| 7          | S  | 11.140602 | 10.268528 | 9.807171  |
| 8          | S  | 8.411627  | 10.492429 | 6.577105  |
| 9          | Ni | 7.316715  | 10.187725 | 8.510610  |
| 10         | S  | 7.012631  | 10.374493 | 10.717229 |
| Isomer 5-5 |    |           |           |           |
| 1          | Ni | 9.037681  | 14.011893 | 11.632544 |
| 2          | S  | 8.513962  | 11.835265 | 11.421180 |

|    |    |           |           |           |
|----|----|-----------|-----------|-----------|
| 3  | Ni | 8.312238  | 13.849173 | 14.365018 |
| 4  | S  | 7.331350  | 14.935437 | 12.657908 |
| 5  | Ni | 6.858295  | 12.825341 | 12.389861 |
| 6  | S  | 6.482733  | 12.697668 | 14.439838 |
| 7  | Ni | 9.753854  | 12.305246 | 13.166166 |
| 8  | S  | 10.150442 | 13.067935 | 15.256339 |
| 9  | Ni | 10.687284 | 14.614025 | 13.858160 |
| 10 | S  | 11.150296 | 13.666205 | 12.015716 |

Isomer 5-6

|    |    |           |           |           |
|----|----|-----------|-----------|-----------|
| 1  | Ni | 11.561991 | 8.909656  | 10.488420 |
| 2  | Ni | 8.548128  | 7.957932  | 10.050024 |
| 3  | Ni | 7.816703  | 9.284656  | 8.255955  |
| 4  | Ni | 10.610378 | 7.656441  | 8.436378  |
| 5  | Ni | 9.617337  | 10.124848 | 9.793408  |
| 6  | S  | 11.342865 | 9.743995  | 8.537573  |
| 7  | S  | 8.517048  | 7.256596  | 7.903362  |
| 8  | S  | 8.041382  | 9.695654  | 11.348776 |
| 9  | S  | 10.542208 | 7.070616  | 10.590781 |
| 10 | S  | 7.485731  | 10.918074 | 9.631961  |

Isomer 6-1

|    |    |           |           |           |
|----|----|-----------|-----------|-----------|
| 1  | Ni | 10.724477 | 9.313635  | 9.177799  |
| 2  | Ni | 8.872769  | 11.220549 | 9.422822  |
| 3  | Ni | 8.816459  | 7.443813  | 9.337504  |
| 4  | Ni | 8.620827  | 9.414905  | 7.500187  |
| 5  | Ni | 9.068298  | 9.250273  | 11.259467 |
| 6  | Ni | 6.964285  | 9.350643  | 9.581759  |
| 7  | S  | 10.250985 | 10.843064 | 7.702374  |
| 8  | S  | 10.549423 | 7.698848  | 10.627244 |
| 9  | S  | 7.187458  | 7.840959  | 7.946057  |
| 10 | S  | 7.138815  | 10.966594 | 8.131930  |
| 11 | S  | 10.502828 | 10.824128 | 10.814602 |
| 12 | S  | 7.435963  | 7.821389  | 11.057019 |

Isomer 6-2

|    |    |           |           |           |
|----|----|-----------|-----------|-----------|
| 1  | Ni | 10.771250 | 9.040397  | 8.938269  |
| 2  | Ni | 9.053134  | 11.126688 | 9.513632  |
| 3  | Ni | 8.949480  | 7.435601  | 8.946105  |
| 4  | Ni | 8.643737  | 9.610597  | 7.523750  |
| 5  | Ni | 9.268999  | 8.915301  | 11.279892 |
| 6  | Ni | 7.097029  | 9.382199  | 9.519798  |
| 7  | S  | 10.783564 | 10.428304 | 10.640026 |
| 8  | S  | 10.613578 | 7.394751  | 10.389335 |
| 9  | S  | 10.070316 | 7.995254  | 7.118716  |
| 10 | S  | 7.263584  | 11.161836 | 8.200868  |

|            |    |           |           |           |
|------------|----|-----------|-----------|-----------|
| 11         | S  | 7.809764  | 10.557614 | 11.227981 |
| 12         | S  | 7.583166  | 7.582787  | 10.655857 |
| Isomer 6-3 |    |           |           |           |
| 1          | Ni | 8.325600  | 11.014485 | 9.085712  |
| 2          | Ni | 10.929879 | 8.225825  | 9.086205  |
| 3          | Ni | 8.325615  | 8.225819  | 9.085649  |
| 4          | Ni | 10.929869 | 11.014470 | 9.086152  |
| 5          | Ni | 9.628067  | 9.620149  | 7.579274  |
| 6          | Ni | 9.627448  | 9.620154  | 11.179780 |
| 7          | S  | 9.627435  | 11.763917 | 10.681186 |
| 8          | S  | 9.627290  | 7.476382  | 10.681189 |
| 9          | S  | 7.485099  | 9.620119  | 10.565628 |
| 10         | S  | 11.770004 | 9.620179  | 10.566189 |
| 11         | S  | 9.628083  | 7.432464  | 7.451086  |
| 12         | S  | 9.628012  | 11.807836 | 7.451086  |
| Isomer 6-4 |    |           |           |           |
| 1          | Ni | 9.340397  | 14.614140 | 12.448934 |
| 2          | S  | 7.302517  | 15.076638 | 11.839646 |
| 3          | Ni | 9.419575  | 13.385661 | 14.865668 |
| 4          | S  | 11.047578 | 13.687533 | 13.440383 |
| 5          | Ni | 7.072575  | 14.242705 | 13.844399 |
| 6          | S  | 7.434075  | 13.244313 | 15.757199 |
| 7          | Ni | 9.692074  | 11.983789 | 12.875541 |
| 8          | S  | 9.333466  | 12.972306 | 10.957100 |
| 9          | Ni | 7.429089  | 11.608224 | 14.271985 |
| 10         | S  | 9.468312  | 11.143824 | 14.879482 |
| 11         | Ni | 7.349568  | 12.838447 | 11.855298 |
| 12         | S  | 5.720828  | 12.533807 | 13.280411 |
| Isomer 6-5 |    |           |           |           |
| 1          | Ni | 10.357576 | 9.256024  | 8.885631  |
| 2          | Ni | 7.321729  | 9.285803  | 11.418454 |
| 3          | Ni | 11.274556 | 9.305959  | 11.620872 |
| 4          | Ni | 9.315919  | 7.783320  | 11.116691 |
| 5          | Ni | 9.416254  | 10.930649 | 10.534893 |
| 6          | Ni | 7.494812  | 9.483750  | 8.854466  |
| 7          | S  | 9.257547  | 9.620013  | 12.339392 |
| 8          | S  | 8.952797  | 9.576307  | 7.355812  |
| 9          | S  | 7.510474  | 7.666404  | 9.990303  |
| 10         | S  | 11.556861 | 10.756104 | 10.045070 |
| 11         | S  | 11.266423 | 7.717250  | 10.204394 |
| 12         | S  | 7.267638  | 11.137615 | 10.308043 |
| Isomer 6-6 |    |           |           |           |

|    |    |           |           |           |
|----|----|-----------|-----------|-----------|
| 1  | Ni | 11.414281 | 9.579573  | 10.388602 |
| 2  | Ni | 8.757650  | 11.015301 | 9.391320  |
| 3  | Ni | 9.168528  | 7.708656  | 9.361628  |
| 4  | Ni | 8.421722  | 9.339057  | 7.506275  |
| 5  | Ni | 8.712803  | 9.342661  | 11.308937 |
| 6  | S  | 9.991213  | 11.054841 | 11.147179 |
| 7  | S  | 7.545112  | 9.176554  | 9.485596  |
| 8  | S  | 10.296668 | 7.871087  | 11.224059 |
| 9  | S  | 9.988789  | 7.854297  | 7.340871  |
| 10 | S  | 9.709630  | 11.052747 | 7.469259  |
| 11 | Ni | 11.231973 | 9.565258  | 7.969620  |
| 12 | S  | 12.774831 | 10.548072 | 9.062840  |

Isomer 7-1

|    |    |           |           |           |
|----|----|-----------|-----------|-----------|
| 1  | Ni | 9.917613  | 9.200540  | 9.266685  |
| 2  | Ni | 11.557592 | 11.207469 | 9.415021  |
| 3  | Ni | 12.373831 | 9.085805  | 8.733141  |
| 4  | Ni | 9.160872  | 11.664712 | 9.779842  |
| 5  | Ni | 9.033895  | 9.767778  | 11.798850 |
| 6  | Ni | 10.973696 | 11.745035 | 11.757616 |
| 7  | Ni | 11.674602 | 9.283914  | 11.163142 |
| 8  | S  | 8.809835  | 11.921097 | 11.914169 |
| 9  | S  | 10.840326 | 10.000177 | 13.083987 |
| 10 | S  | 10.899782 | 10.149833 | 7.571029  |
| 11 | S  | 10.830300 | 13.131283 | 10.017293 |
| 12 | S  | 9.950803  | 7.909782  | 11.055136 |
| 13 | S  | 7.901796  | 9.869708  | 9.882791  |
| 14 | S  | 13.390833 | 10.251385 | 10.234227 |

Isomer 7-2

|    |    |           |           |           |
|----|----|-----------|-----------|-----------|
| 1  | Ni | 9.687819  | 8.536293  | 9.387902  |
| 2  | Ni | 12.295789 | 11.181818 | 9.250701  |
| 3  | Ni | 12.187531 | 8.651704  | 8.710389  |
| 4  | Ni | 9.447056  | 11.392384 | 9.491529  |
| 5  | Ni | 9.234821  | 9.770227  | 11.583929 |
| 6  | Ni | 11.176357 | 11.720796 | 11.488530 |
| 7  | Ni | 11.639403 | 9.299434  | 10.992500 |
| 8  | S  | 9.020966  | 11.926746 | 11.614072 |
| 9  | S  | 10.989255 | 10.030448 | 12.908061 |
| 10 | S  | 10.662390 | 10.119610 | 8.105505  |
| 11 | S  | 11.076181 | 12.923336 | 9.618168  |
| 12 | S  | 11.298881 | 7.283972  | 10.123502 |
| 13 | S  | 7.939263  | 9.761466  | 9.779238  |
| 14 | S  | 13.606010 | 9.629335  | 10.012590 |

Isomer 7-3

|    |    |           |           |           |
|----|----|-----------|-----------|-----------|
| 1  | Ni | 9.590869  | 8.733993  | 9.384783  |
| 2  | Ni | 12.130572 | 11.442422 | 9.358404  |
| 3  | Ni | 12.067839 | 8.943848  | 8.660592  |
| 4  | Ni | 9.285525  | 11.562102 | 9.672193  |
| 5  | Ni | 9.166518  | 9.809333  | 11.662570 |
| 6  | Ni | 11.050264 | 11.821522 | 11.646444 |
| 7  | Ni | 11.571030 | 9.443110  | 10.988097 |
| 8  | S  | 8.894877  | 11.952945 | 11.831581 |
| 9  | S  | 10.946937 | 10.041589 | 12.954673 |
| 10 | S  | 10.497604 | 10.413756 | 8.183237  |
| 11 | S  | 10.875127 | 13.132004 | 9.859201  |
| 12 | S  | 11.242878 | 7.476024  | 10.011446 |
| 13 | S  | 7.824476  | 9.875299  | 9.892616  |
| 14 | S  | 13.501490 | 9.879545  | 9.979424  |

Isomer 7-4

|    |    |           |           |           |
|----|----|-----------|-----------|-----------|
| 1  | Ni | 9.888586  | 9.197650  | 9.199948  |
| 2  | Ni | 11.628347 | 11.165278 | 9.708408  |
| 3  | Ni | 12.282305 | 9.026074  | 8.731002  |
| 4  | Ni | 9.221109  | 11.861159 | 9.816164  |
| 5  | Ni | 9.094861  | 9.721729  | 11.562803 |
| 6  | Ni | 11.011303 | 11.738927 | 11.960220 |
| 7  | Ni | 11.762246 | 8.978377  | 11.121112 |
| 8  | S  | 8.830821  | 11.847005 | 11.981189 |
| 9  | S  | 10.867549 | 9.775858  | 12.957168 |
| 10 | S  | 10.752547 | 8.169752  | 7.579560  |
| 11 | S  | 9.925983  | 7.814727  | 10.900173 |
| 12 | S  | 10.961075 | 13.167103 | 10.224297 |
| 13 | S  | 7.947961  | 10.085573 | 9.635940  |
| 14 | S  | 13.454120 | 10.073416 | 10.232032 |

Isomer 7-5

|    |    |           |           |           |
|----|----|-----------|-----------|-----------|
| 1  | Ni | 9.097896  | 14.389630 | 12.008756 |
| 2  | Ni | 10.485939 | 12.817201 | 13.040302 |
| 3  | Ni | 7.213525  | 15.628268 | 13.411454 |
| 4  | Ni | 8.429701  | 11.597100 | 13.769360 |
| 5  | Ni | 6.554725  | 13.257736 | 14.683427 |
| 6  | Ni | 6.859765  | 13.291804 | 12.054325 |
| 7  | Ni | 8.915936  | 14.143944 | 14.523340 |
| 8  | S  | 5.408938  | 14.445953 | 13.279510 |
| 9  | S  | 7.314738  | 15.170314 | 15.566394 |
| 10 | S  | 7.327307  | 15.350164 | 11.243561 |
| 11 | S  | 11.213565 | 14.499975 | 11.962391 |
| 12 | S  | 8.780144  | 12.160522 | 11.713531 |
| 13 | S  | 6.293601  | 11.517446 | 13.381902 |
| 14 | S  | 9.967231  | 12.335642 | 15.116158 |

## Isomer 7-6

|    |    |           |           |           |
|----|----|-----------|-----------|-----------|
| 1  | Ni | 9.131670  | 9.231333  | 8.384207  |
| 2  | Ni | 11.314894 | 11.640555 | 9.094557  |
| 3  | Ni | 11.671948 | 9.014255  | 8.315916  |
| 4  | Ni | 8.965842  | 11.687162 | 8.472269  |
| 5  | Ni | 9.448480  | 11.385150 | 10.824098 |
| 6  | Ni | 11.486715 | 8.956694  | 10.859354 |
| 7  | Ni | 8.952735  | 8.727917  | 10.867065 |
| 8  | S  | 12.835101 | 10.192172 | 9.700953  |
| 9  | S  | 7.797062  | 10.275765 | 9.801890  |
| 10 | S  | 9.745386  | 13.585982 | 9.061791  |
| 11 | S  | 10.297222 | 7.750578  | 9.454412  |
| 12 | S  | 10.502519 | 10.550277 | 7.287958  |
| 13 | S  | 10.126690 | 9.885768  | 12.259140 |
| 14 | S  | 10.904511 | 13.054073 | 10.768147 |

## Isomer 8-1

|    |    |           |           |           |
|----|----|-----------|-----------|-----------|
| 1  | Ni | 8.068506  | 10.005751 | 9.522966  |
| 2  | Ni | 9.829465  | 9.634766  | 8.060347  |
| 3  | Ni | 9.378652  | 11.393507 | 11.141348 |
| 4  | Ni | 9.216955  | 8.932983  | 11.612107 |
| 5  | Ni | 11.602856 | 10.125030 | 11.899166 |
| 6  | Ni | 11.434522 | 8.489572  | 9.805753  |
| 7  | Ni | 11.513693 | 10.966321 | 9.365459  |
| 8  | S  | 9.838560  | 10.390195 | 13.119613 |
| 9  | S  | 11.437358 | 12.199149 | 11.208411 |
| 10 | S  | 7.415414  | 10.306535 | 11.522051 |
| 11 | S  | 10.473700 | 7.174680  | 11.261616 |
| 12 | S  | 8.001730  | 8.495345  | 7.992863  |
| 13 | S  | 11.920693 | 9.382014  | 7.784787  |
| 14 | S  | 9.411920  | 11.690956 | 8.872945  |
| 15 | Ni | 9.160813  | 7.562016  | 9.567294  |
| 16 | S  | 13.112798 | 9.757418  | 10.407712 |

## Isomer 8-2

|    |    |           |           |           |
|----|----|-----------|-----------|-----------|
| 1  | Ni | 10.062001 | 14.870405 | 12.561070 |
| 2  | S  | 8.076805  | 15.062487 | 11.609942 |
| 3  | Ni | 9.959497  | 13.203123 | 14.484538 |
| 4  | S  | 11.689378 | 14.357295 | 13.911240 |
| 5  | Ni | 6.073324  | 14.375515 | 14.327007 |
| 6  | S  | 6.240464  | 12.317095 | 13.685721 |
| 7  | Ni | 7.882247  | 15.098478 | 16.142332 |
| 8  | S  | 9.489172  | 13.683231 | 16.628917 |
| 9  | Ni | 8.084427  | 15.712202 | 13.720605 |
| 10 | S  | 6.511511  | 16.404664 | 15.037210 |

|    |    |           |           |           |
|----|----|-----------|-----------|-----------|
| 11 | Ni | 10.235816 | 15.392007 | 15.276401 |
| 12 | S  | 9.968110  | 16.802854 | 13.659794 |
| 13 | Ni | 7.770969  | 12.526908 | 15.312253 |
| 14 | S  | 6.237201  | 13.692831 | 16.417048 |
| 15 | Ni | 8.007124  | 13.226386 | 12.791280 |
| 16 | S  | 8.985670  | 11.450687 | 13.776442 |

Isomer 8-3

|    |    |           |           |           |
|----|----|-----------|-----------|-----------|
| 1  | Ni | 11.205582 | 9.678393  | 11.634998 |
| 2  | Ni | 8.769423  | 8.003746  | 8.962664  |
| 3  | Ni | 10.893004 | 9.403667  | 9.045841  |
| 4  | Ni | 11.787406 | 11.710069 | 9.886608  |
| 5  | Ni | 9.357115  | 11.576365 | 8.947583  |
| 6  | Ni | 7.349824  | 10.020160 | 8.899107  |
| 7  | Ni | 9.628967  | 11.864247 | 11.565126 |
| 8  | S  | 9.434296  | 10.106971 | 12.913609 |
| 9  | S  | 9.215465  | 9.786100  | 7.666399  |
| 10 | S  | 10.298586 | 7.867687  | 10.504611 |
| 11 | S  | 12.797476 | 9.786459  | 10.025134 |
| 12 | S  | 10.289503 | 13.286064 | 9.918965  |
| 13 | S  | 7.668114  | 11.593419 | 10.360418 |
| 14 | S  | 6.975367  | 8.284688  | 10.119859 |
| 15 | Ni | 8.682269  | 9.526492  | 10.955968 |
| 16 | S  | 11.761716 | 11.752570 | 12.069242 |

Isomer 8-4

|    |    |           |           |           |
|----|----|-----------|-----------|-----------|
| 1  | Ni | 9.518920  | 9.016219  | 9.092669  |
| 2  | Ni | 12.206510 | 11.395361 | 9.674837  |
| 3  | Ni | 11.845379 | 8.959162  | 9.109675  |
| 4  | Ni | 9.262908  | 11.466364 | 9.643221  |
| 5  | Ni | 8.951004  | 9.809853  | 11.463932 |
| 6  | Ni | 10.722978 | 11.895207 | 11.918172 |
| 7  | Ni | 12.396661 | 9.726403  | 11.496935 |
| 8  | S  | 8.531815  | 11.941780 | 11.717999 |
| 9  | S  | 10.655178 | 9.588662  | 12.903378 |
| 10 | S  | 10.732785 | 10.626927 | 8.061672  |
| 11 | S  | 10.767163 | 13.031835 | 10.039726 |
| 12 | Ni | 10.627266 | 8.039960  | 11.267375 |
| 13 | S  | 7.642507  | 9.898229  | 9.677735  |
| 14 | S  | 13.747403 | 9.746306  | 9.733290  |
| 15 | S  | 12.916383 | 11.837120 | 11.766609 |
| 16 | S  | 10.633320 | 7.200502  | 9.297197  |

Isomer 8-5

|   |    |           |           |          |
|---|----|-----------|-----------|----------|
| 1 | Ni | 9.700856  | 8.136251  | 9.597039 |
| 2 | Ni | 12.150378 | 11.242507 | 9.205544 |

|    |    |           |           |           |
|----|----|-----------|-----------|-----------|
| 3  | Ni | 12.294882 | 8.680576  | 8.760400  |
| 4  | Ni | 9.622051  | 11.867865 | 9.627794  |
| 5  | Ni | 9.246056  | 9.848757  | 11.393432 |
| 6  | Ni | 11.223359 | 11.619282 | 11.837005 |
| 7  | Ni | 11.639773 | 9.320903  | 11.000576 |
| 8  | S  | 9.053517  | 11.981232 | 11.762845 |
| 9  | S  | 10.798169 | 9.761536  | 12.937898 |
| 10 | Ni | 10.108551 | 9.977676  | 8.222060  |
| 11 | S  | 11.451746 | 13.040639 | 10.210017 |
| 12 | S  | 11.532814 | 7.269369  | 10.301011 |
| 13 | S  | 8.219406  | 9.912404  | 9.459467  |
| 14 | S  | 13.579728 | 9.881669  | 10.127235 |
| 15 | S  | 10.624452 | 8.004587  | 7.540274  |
| 16 | S  | 10.675160 | 11.941585 | 7.664115  |

Isomer 8-6

|    |    |           |           |           |
|----|----|-----------|-----------|-----------|
| 1  | Ni | 9.889203  | 8.895145  | 9.097224  |
| 2  | Ni | 11.657030 | 10.706148 | 8.462218  |
| 3  | Ni | 12.398468 | 8.285117  | 9.028270  |
| 4  | Ni | 9.622730  | 11.449373 | 9.537825  |
| 5  | Ni | 9.209164  | 9.737122  | 11.642580 |
| 6  | Ni | 11.336233 | 11.376612 | 11.623097 |
| 7  | Ni | 11.499368 | 8.914525  | 11.197256 |
| 8  | S  | 9.235461  | 11.938456 | 11.660812 |
| 9  | S  | 10.891481 | 9.793130  | 13.068028 |
| 10 | S  | 9.764100  | 10.504548 | 7.528795  |
| 11 | S  | 11.824960 | 12.485827 | 9.815071  |
| 12 | S  | 10.783248 | 7.165092  | 10.068658 |
| 13 | S  | 8.063632  | 9.850172  | 9.791155  |
| 14 | Ni | 13.256056 | 10.677722 | 10.148348 |
| 15 | S  | 13.620276 | 8.677752  | 10.838561 |
| 16 | S  | 13.576093 | 9.827422  | 8.061942  |

Isomer 9-1

|    |    |           |           |           |
|----|----|-----------|-----------|-----------|
| 1  | Ni | 9.196211  | 10.000916 | 8.923744  |
| 2  | Ni | 11.292163 | 11.358574 | 8.436948  |
| 3  | Ni | 11.567296 | 9.125526  | 9.596543  |
| 4  | Ni | 9.737664  | 12.278933 | 10.202093 |
| 5  | Ni | 9.411229  | 8.767473  | 11.148923 |
| 6  | Ni | 9.949001  | 10.991922 | 12.393361 |
| 7  | Ni | 11.775241 | 9.165844  | 12.095818 |
| 8  | S  | 8.506108  | 12.563549 | 11.969390 |
| 9  | S  | 12.057444 | 11.189286 | 12.978104 |
| 10 | S  | 10.857397 | 9.411947  | 7.577893  |
| 11 | S  | 11.714561 | 13.109272 | 9.663642  |
| 12 | S  | 11.120957 | 7.411465  | 10.885433 |

|    |    |           |           |           |
|----|----|-----------|-----------|-----------|
| 13 | S  | 7.615648  | 8.892192  | 9.928394  |
| 14 | S  | 13.446243 | 9.556566  | 10.660184 |
| 15 | Ni | 12.132924 | 11.319869 | 10.803271 |
| 16 | S  | 9.251737  | 12.036188 | 8.050150  |
| 17 | S  | 9.913977  | 8.976903  | 13.286139 |
| 18 | Ni | 7.931825  | 10.754908 | 10.952879 |

Isomer 9-2

|    |    |           |           |           |
|----|----|-----------|-----------|-----------|
| 1  | Ni | 9.225490  | 10.145852 | 8.532659  |
| 2  | Ni | 11.311482 | 11.799166 | 8.483943  |
| 3  | Ni | 11.747704 | 9.386624  | 9.170348  |
| 4  | Ni | 9.296705  | 12.023341 | 10.259296 |
| 5  | Ni | 8.943696  | 10.173231 | 11.956214 |
| 6  | Ni | 11.007642 | 11.823780 | 12.322094 |
| 7  | Ni | 11.562335 | 9.394808  | 11.728411 |
| 8  | S  | 8.825886  | 12.307285 | 12.368241 |
| 9  | S  | 10.442991 | 10.008008 | 13.504739 |
| 10 | S  | 10.946253 | 9.985443  | 7.225532  |
| 11 | S  | 11.155013 | 13.191784 | 10.391289 |
| 12 | S  | 11.669475 | 7.634302  | 10.452478 |
| 13 | S  | 7.862032  | 9.631628  | 10.149516 |
| 14 | S  | 13.347925 | 10.885966 | 8.673459  |
| 15 | Ni | 9.683091  | 8.433109  | 10.308900 |
| 16 | S  | 13.044857 | 10.906812 | 12.481377 |
| 17 | Ni | 12.580470 | 11.525352 | 10.524487 |
| 18 | S  | 9.158446  | 12.278314 | 8.100717  |

Isomer 9-3

|    |    |           |           |           |
|----|----|-----------|-----------|-----------|
| 1  | Ni | 9.430520  | 14.499250 | 11.837649 |
| 2  | S  | 7.608947  | 15.760521 | 11.895087 |
| 3  | Ni | 8.850048  | 14.096096 | 15.822320 |
| 4  | S  | 11.532317 | 13.936396 | 12.229861 |
| 5  | Ni | 6.664376  | 13.718161 | 14.357395 |
| 6  | S  | 7.249084  | 12.562560 | 16.125618 |
| 7  | Ni | 10.269749 | 12.251418 | 12.942467 |
| 8  | S  | 8.954202  | 12.466364 | 11.136977 |
| 9  | Ni | 8.618812  | 11.768510 | 14.655328 |
| 10 | S  | 9.357517  | 10.249045 | 13.277824 |
| 11 | Ni | 7.141413  | 13.679541 | 11.839767 |
| 12 | S  | 5.821947  | 12.333824 | 12.920332 |
| 13 | Ni | 8.544371  | 15.931104 | 13.831562 |
| 14 | S  | 10.060022 | 15.967834 | 15.455073 |
| 15 | Ni | 7.651805  | 11.322129 | 12.426160 |
| 16 | S  | 10.517007 | 12.600594 | 15.413742 |
| 17 | Ni | 10.573467 | 14.387681 | 14.100610 |
| 18 | S  | 7.188081  | 15.538133 | 15.466273 |

## Isomer 9-4

|    |    |           |           |           |
|----|----|-----------|-----------|-----------|
| 1  | Ni | 7.980632  | 9.562094  | 10.336028 |
| 2  | Ni | 9.761429  | 9.883974  | 8.492389  |
| 3  | Ni | 9.537523  | 11.547251 | 10.576986 |
| 4  | Ni | 9.739648  | 8.207925  | 11.763055 |
| 5  | Ni | 11.316457 | 10.147183 | 11.810345 |
| 6  | Ni | 11.691205 | 8.269168  | 9.376465  |
| 7  | Ni | 11.712778 | 11.070581 | 9.346644  |
| 8  | Ni | 8.914683  | 10.340550 | 12.613096 |
| 9  | S  | 11.542860 | 12.258182 | 11.193174 |
| 10 | S  | 7.536852  | 11.427074 | 11.377278 |
| 11 | S  | 10.849244 | 6.710795  | 10.590535 |
| 12 | S  | 7.905740  | 8.823753  | 8.240524  |
| 13 | S  | 11.788979 | 9.620214  | 7.680112  |
| 14 | S  | 9.926488  | 12.081958 | 8.485248  |
| 15 | Ni | 9.239720  | 7.578818  | 9.397606  |
| 16 | S  | 12.974774 | 9.641872  | 10.466675 |
| 17 | S  | 7.780252  | 7.457699  | 11.014055 |
| 18 | S  | 10.456737 | 9.166633  | 13.550319 |

## Isomer 9-5

|    |    |           |           |           |
|----|----|-----------|-----------|-----------|
| 1  | Ni | 9.338523  | 9.407133  | 8.094431  |
| 2  | Ni | 10.905648 | 11.504995 | 7.856457  |
| 3  | Ni | 11.808584 | 9.299427  | 8.753780  |
| 4  | Ni | 8.578817  | 11.666683 | 8.911078  |
| 5  | Ni | 10.058404 | 11.623400 | 11.173232 |
| 6  | Ni | 11.075863 | 9.233326  | 11.154683 |
| 7  | Ni | 8.782111  | 9.517942  | 10.418962 |
| 8  | S  | 13.141985 | 9.074605  | 10.566886 |
| 9  | S  | 7.345446  | 9.865407  | 8.854334  |
| 10 | S  | 8.512629  | 13.087212 | 10.585897 |
| 11 | S  | 10.168987 | 7.930233  | 9.561538  |
| 12 | S  | 10.959723 | 9.602817  | 6.693604  |
| 13 | S  | 9.464444  | 9.928981  | 12.424332 |
| 14 | S  | 11.748438 | 13.103437 | 11.117858 |
| 15 | Ni | 12.656307 | 11.213692 | 10.621052 |
| 16 | S  | 9.488332  | 13.127294 | 7.491330  |
| 17 | Ni | 10.376809 | 13.309751 | 9.441946  |
| 18 | S  | 12.977835 | 11.168928 | 8.468394  |

## Isomer 9-6

|   |    |           |           |           |
|---|----|-----------|-----------|-----------|
| 1 | Ni | 10.413834 | 15.072278 | 12.538456 |
| 2 | S  | 8.652333  | 15.136654 | 11.238039 |
| 3 | Ni | 9.954118  | 13.103430 | 14.408605 |
| 4 | S  | 11.492323 | 14.715632 | 14.415707 |

|    |    |           |           |           |
|----|----|-----------|-----------|-----------|
| 5  | Ni | 5.973143  | 14.939181 | 14.805796 |
| 6  | Ni | 6.375190  | 12.576089 | 14.130607 |
| 7  | Ni | 7.617818  | 14.686659 | 16.656171 |
| 8  | S  | 9.578439  | 13.726885 | 16.599390 |
| 9  | Ni | 7.843097  | 15.760441 | 13.219671 |
| 10 | S  | 7.432087  | 16.456678 | 15.391184 |
| 11 | Ni | 9.526736  | 15.502447 | 15.100868 |
| 12 | S  | 9.712133  | 16.954394 | 13.417626 |
| 13 | Ni | 8.022280  | 12.328209 | 15.971845 |
| 14 | S  | 6.090042  | 13.260447 | 16.150222 |
| 15 | Ni | 8.258478  | 13.362225 | 12.524567 |
| 16 | S  | 8.293347  | 11.540427 | 13.955190 |
| 17 | S  | 10.430545 | 12.902974 | 12.244612 |
| 18 | S  | 6.142362  | 14.247810 | 12.747350 |

Isomer 10-1

|    |    |           |           |           |
|----|----|-----------|-----------|-----------|
| 1  | Ni | 9.311456  | 15.351501 | 11.887446 |
| 2  | Ni | 10.122796 | 12.131429 | 13.082196 |
| 3  | Ni | 7.323888  | 15.635676 | 13.696823 |
| 4  | Ni | 7.606019  | 11.630008 | 12.695711 |
| 5  | Ni | 6.615063  | 13.283119 | 14.325414 |
| 6  | Ni | 6.857583  | 14.514852 | 11.309676 |
| 7  | Ni | 8.845400  | 14.306428 | 15.204440 |
| 8  | S  | 5.482126  | 14.641679 | 13.033508 |
| 9  | S  | 6.867762  | 14.935686 | 15.767300 |
| 10 | S  | 7.476042  | 16.618500 | 11.740169 |
| 11 | S  | 10.967654 | 13.689068 | 11.676042 |
| 12 | S  | 9.329327  | 10.767005 | 11.619306 |
| 13 | S  | 6.481622  | 11.142826 | 14.454896 |
| 14 | S  | 10.454357 | 12.746545 | 15.221048 |
| 15 | Ni | 8.957039  | 12.858102 | 10.948542 |
| 16 | S  | 9.527979  | 16.155834 | 14.070160 |
| 17 | S  | 6.816462  | 12.375159 | 10.791084 |
| 18 | Ni | 8.489098  | 11.801880 | 15.006083 |
| 19 | S  | 8.576321  | 14.732853 | 9.879061  |
| 20 | Ni | 10.671300 | 14.340916 | 13.729055 |

Isomer 10-2

|   |    |           |           |           |
|---|----|-----------|-----------|-----------|
| 1 | Ni | 9.349905  | 14.990106 | 12.307388 |
| 2 | Ni | 10.124185 | 12.775538 | 13.339078 |
| 3 | Ni | 7.272543  | 15.796477 | 13.602771 |
| 4 | Ni | 8.078831  | 11.027098 | 12.659199 |
| 5 | Ni | 6.480660  | 13.391438 | 14.541077 |
| 6 | Ni | 7.023404  | 14.327220 | 11.538512 |
| 7 | Ni | 8.797042  | 14.380912 | 14.891036 |
| 8 | S  | 5.396074  | 14.552296 | 12.993517 |

|    |    |           |           |           |
|----|----|-----------|-----------|-----------|
| 9  | S  | 6.924655  | 15.167610 | 15.713754 |
| 10 | S  | 7.763944  | 16.337643 | 11.496407 |
| 11 | S  | 10.892699 | 13.689990 | 11.536394 |
| 12 | S  | 8.289464  | 10.859570 | 10.517736 |
| 13 | S  | 6.469056  | 11.206463 | 14.239192 |
| 14 | S  | 10.230458 | 12.940424 | 15.552805 |
| 15 | Ni | 8.990418  | 12.903809 | 10.955014 |
| 16 | S  | 9.389132  | 16.316595 | 14.065478 |
| 17 | S  | 6.805077  | 12.513592 | 10.282444 |
| 18 | Ni | 8.516499  | 11.778130 | 14.919419 |
| 19 | S  | 9.935970  | 10.592233 | 13.694577 |
| 20 | Ni | 6.115622  | 12.319028 | 12.356367 |

Isomer 10-3

|    |    |           |           |           |
|----|----|-----------|-----------|-----------|
| 1  | Ni | 9.771668  | 8.791580  | 9.345250  |
| 2  | Ni | 11.482281 | 11.733669 | 8.298118  |
| 3  | Ni | 11.816890 | 9.424515  | 8.074928  |
| 4  | Ni | 9.380821  | 11.498161 | 9.614369  |
| 5  | Ni | 9.136220  | 9.848888  | 11.721585 |
| 6  | Ni | 10.930029 | 11.843120 | 11.806883 |
| 7  | Ni | 11.408615 | 8.506354  | 11.486013 |
| 8  | S  | 8.755644  | 12.032700 | 11.698823 |
| 9  | S  | 10.863276 | 9.995958  | 13.199278 |
| 10 | S  | 9.884281  | 10.375761 | 7.641105  |
| 11 | S  | 11.040881 | 13.094970 | 9.908847  |
| 12 | S  | 11.810825 | 7.714898  | 9.381914  |
| 13 | S  | 7.925814  | 9.865495  | 9.881816  |
| 14 | S  | 13.599162 | 8.356692  | 11.909014 |
| 15 | Ni | 12.982134 | 11.960332 | 10.203828 |
| 16 | S  | 13.480613 | 10.830176 | 8.352710  |
| 17 | Ni | 13.367975 | 9.276032  | 9.948039  |
| 18 | S  | 13.016248 | 12.493051 | 12.311694 |
| 19 | Ni | 12.849442 | 10.351799 | 12.190471 |
| 20 | S  | 9.386786  | 7.701529  | 11.278868 |

Isomer 10-4

|    |    |           |           |           |
|----|----|-----------|-----------|-----------|
| 1  | Ni | 9.320075  | 10.004513 | 8.259472  |
| 2  | Ni | 11.229177 | 11.924344 | 8.432202  |
| 3  | Ni | 11.923847 | 9.547589  | 8.631409  |
| 4  | Ni | 9.300003  | 11.745452 | 10.230383 |
| 5  | Ni | 8.928528  | 9.996251  | 12.292299 |
| 6  | Ni | 10.868411 | 11.931682 | 12.292292 |
| 7  | Ni | 11.585401 | 9.333801  | 12.268496 |
| 8  | S  | 8.658304  | 12.171156 | 12.298406 |
| 9  | S  | 10.432833 | 10.402532 | 13.821067 |
| 10 | S  | 10.938118 | 10.305224 | 6.879350  |

|    |    |           |           |           |
|----|----|-----------|-----------|-----------|
| 11 | S  | 10.826897 | 13.374815 | 10.400239 |
| 12 | S  | 12.226156 | 8.039649  | 10.261354 |
| 13 | S  | 8.142712  | 9.717204  | 10.128691 |
| 14 | S  | 13.420468 | 11.216679 | 8.757964  |
| 15 | Ni | 10.143393 | 8.735284  | 10.266743 |
| 16 | S  | 13.036896 | 11.102158 | 12.384505 |
| 17 | Ni | 12.553298 | 12.150966 | 10.511119 |
| 18 | S  | 9.051608  | 12.155847 | 8.076361  |
| 19 | S  | 9.819453  | 7.972799  | 12.289330 |
| 20 | Ni | 13.283655 | 9.911726  | 10.558852 |

Isomer 10-5

|    |    |           |           |           |
|----|----|-----------|-----------|-----------|
| 1  | Ni | 10.152051 | 9.241181  | 11.981606 |
| 2  | Ni | 9.655025  | 8.969488  | 8.884550  |
| 3  | Ni | 11.871845 | 8.798274  | 10.076202 |
| 4  | Ni | 11.168476 | 11.017538 | 8.835949  |
| 5  | Ni | 9.170892  | 12.315012 | 8.976224  |
| 6  | Ni | 7.611759  | 10.413704 | 9.285994  |
| 7  | Ni | 7.978755  | 10.661089 | 11.954192 |
| 8  | S  | 10.044241 | 11.239183 | 13.000528 |
| 9  | S  | 9.356555  | 10.680848 | 7.554130  |
| 10 | S  | 10.133046 | 7.467217  | 10.459258 |
| 11 | S  | 13.104922 | 10.489111 | 9.610425  |
| 12 | S  | 11.095644 | 13.008191 | 9.865992  |
| 13 | S  | 7.554877  | 12.375890 | 10.460293 |
| 14 | S  | 7.597823  | 8.279810  | 8.641674  |
| 15 | Ni | 11.740982 | 11.210881 | 11.249425 |
| 16 | S  | 8.248380  | 8.677569  | 12.944396 |
| 17 | Ni | 9.582206  | 12.415614 | 11.295686 |
| 18 | S  | 12.354141 | 9.267722  | 12.149724 |
| 19 | S  | 6.333226  | 9.635038  | 10.912603 |
| 20 | Ni | 7.952240  | 8.176592  | 10.827229 |

Isomer 10-6

|    |    |           |           |           |
|----|----|-----------|-----------|-----------|
| 1  | Ni | 9.008536  | 10.318144 | 8.774283  |
| 2  | Ni | 11.527808 | 11.083972 | 8.650323  |
| 3  | Ni | 10.817729 | 8.620881  | 9.597312  |
| 4  | Ni | 9.479302  | 12.625958 | 9.910580  |
| 5  | Ni | 9.862464  | 8.548555  | 11.824777 |
| 6  | Ni | 10.987574 | 11.796307 | 11.749950 |
| 7  | Ni | 12.334142 | 9.170244  | 11.697190 |
| 8  | S  | 9.012593  | 12.536488 | 12.052310 |
| 9  | Ni | 10.800793 | 10.142128 | 13.452757 |
| 10 | S  | 10.608286 | 9.342551  | 7.561591  |
| 11 | S  | 11.733768 | 12.951369 | 9.945083  |
| 12 | S  | 11.471949 | 7.224512  | 11.215412 |

|    |    |           |           |           |
|----|----|-----------|-----------|-----------|
| 13 | S  | 8.537299  | 8.487523  | 10.068608 |
| 14 | S  | 12.897692 | 9.474908  | 9.567943  |
| 15 | Ni | 13.025882 | 11.347019 | 10.706072 |
| 16 | S  | 9.776234  | 12.127290 | 7.774895  |
| 17 | S  | 8.737576  | 9.493095  | 13.378199 |
| 18 | Ni | 8.478413  | 10.468616 | 11.364000 |
| 19 | S  | 7.511172  | 11.621293 | 9.743646  |
| 20 | S  | 12.755888 | 11.005810 | 12.877178 |

Table S3. The x,y,z coordinates of the proposed structures of the Ni<sub>4</sub>S<sub>4</sub> cluster with adsorbed hydrogen atoms.

**Coordinates (Angstroms) of Ni<sub>4</sub>S<sub>4</sub> Cluster with adsorbed hydrogen atoms**

| System                                    | ATOM | X         | Y         | Z         |
|-------------------------------------------|------|-----------|-----------|-----------|
| Isomer Ni <sub>4</sub> S <sub>4</sub> @1H |      |           |           |           |
| 1                                         | Ni   | -0.969246 | -0.969322 | 0.833229  |
| 2                                         | S    | -1.104409 | -1.114437 | -1.337387 |
| 3                                         | Ni   | 1.017924  | -0.991697 | -0.794352 |
| 4                                         | S    | 1.145074  | -1.085541 | 1.367465  |
| 5                                         | Ni   | -1.002271 | 1.013515  | -0.810259 |
| 6                                         | S    | 1.088720  | 1.093735  | -1.465984 |
| 7                                         | Ni   | 1.012618  | 1.043481  | 0.817727  |
| 8                                         | S    | -1.122577 | 1.146003  | 1.350105  |
| 9                                         | H    | 1.371546  | 1.410022  | 2.196163  |
| Isomer Ni <sub>4</sub> S <sub>4</sub> @2H |      |           |           |           |
| 1                                         | Ni   | -0.858938 | -0.904259 | 0.841856  |
| 2                                         | S    | -0.864512 | -1.292335 | -1.303991 |
| 3                                         | Ni   | 1.267858  | -0.777116 | -0.904737 |
| 4                                         | S    | 1.280835  | -1.055289 | 1.232580  |
| 5                                         | Ni   | -1.097914 | 0.829552  | -0.924387 |
| 6                                         | S    | 0.976303  | 1.410301  | -1.350378 |
| 7                                         | Ni   | 1.098441  | 1.059555  | 0.862428  |
| 8                                         | S    | -1.108204 | 1.227508  | 1.203965  |
| 9                                         | H    | 1.301224  | 1.243246  | 2.314316  |
| 10                                        | H    | 1.601012  | -2.209173 | -0.997030 |
| Isomer Ni <sub>4</sub> S <sub>4</sub> @3H |      |           |           |           |
| 1                                         | Ni   | -0.540321 | -1.021285 | 1.011754  |
| 2                                         | S    | -1.146227 | -1.250117 | -1.093151 |
| 3                                         | Ni   | 1.009020  | -0.932873 | -1.113017 |
| 4                                         | S    | 1.633628  | -0.788600 | 0.976638  |
| 5                                         | Ni   | -0.678786 | 0.852752  | -0.931932 |
| 6                                         | S    | 1.462014  | 1.467568  | -1.318259 |
| 7                                         | Ni   | 0.823489  | 1.262189  | 0.983136  |
| 8                                         | S    | -1.332614 | 1.028510  | 1.117910  |
| 9                                         | H    | 1.003347  | 1.354412  | 2.429912  |
| 10                                        | H    | 1.356887  | -2.352447 | -1.152575 |
| 11                                        | H    | 0.960138  | 2.388985  | -2.210464 |
| Isomer Ni <sub>4</sub> S <sub>4</sub> @4H |      |           |           |           |
| 1                                         | Ni   | -0.751142 | -0.892366 | 0.834764  |
| 2                                         | S    | -0.927274 | -1.214531 | -1.357891 |
| 3                                         | Ni   | 1.180497  | -0.814537 | -1.029705 |

|    |    |           |           |           |
|----|----|-----------|-----------|-----------|
| 4  | S  | 1.438432  | -0.932969 | 1.127910  |
| 5  | Ni | -0.867965 | 0.912339  | -1.071774 |
| 6  | S  | 1.626384  | 1.445036  | -1.330503 |
| 7  | Ni | 0.968082  | 1.177605  | 0.870158  |
| 8  | S  | -1.197355 | 1.272113  | 1.022001  |
| 9  | H  | 1.005852  | 1.338147  | 2.320559  |
| 10 | H  | 1.376019  | -2.260568 | -1.092078 |
| 11 | H  | 0.652546  | 2.101468  | -2.063109 |
| 12 | H  | -2.286693 | 1.032379  | -1.385340 |

Isomer Ni<sub>4</sub>S<sub>4</sub>@5H

|    |    |           |           |           |
|----|----|-----------|-----------|-----------|
| 1  | Ni | -1.096183 | -0.776999 | 1.068554  |
| 2  | S  | -1.246882 | -1.201192 | -1.034398 |
| 3  | Ni | 0.906324  | -0.985429 | -0.834671 |
| 4  | S  | 1.069180  | -1.237284 | 1.395285  |
| 5  | Ni | -0.995307 | 0.940587  | -0.811965 |
| 6  | S  | 1.205858  | 1.229975  | -1.338738 |
| 7  | Ni | 1.009896  | 0.857760  | 1.008314  |
| 8  | S  | -1.077814 | 1.422537  | 1.357133  |
| 9  | H  | -1.366202 | 1.034699  | -2.235085 |
| 10 | H  | -1.567813 | -2.145908 | 1.332330  |
| 11 | H  | 1.808250  | 1.312645  | 2.156898  |
| 12 | H  | 0.935829  | -1.260141 | -2.291481 |
| 13 | H  | 1.841545  | 1.913821  | -0.227419 |

Isomer Ni<sub>4</sub>S<sub>4</sub>@6H

|    |    |           |           |           |
|----|----|-----------|-----------|-----------|
| 1  | Ni | -0.780020 | -0.733601 | 0.829987  |
| 2  | S  | -1.047869 | -1.161196 | -1.350600 |
| 3  | Ni | 1.083600  | -0.905717 | -1.189315 |
| 4  | S  | 1.444324  | -1.006751 | 0.945420  |
| 5  | Ni | -0.769022 | 0.976328  | -1.286728 |
| 6  | S  | 1.440228  | 1.264346  | -1.955767 |
| 7  | Ni | 1.112253  | 1.073261  | 0.577707  |
| 8  | S  | -0.960026 | 1.537910  | 0.796197  |
| 9  | H  | 1.435211  | 1.471735  | 1.944653  |
| 10 | H  | 1.265037  | -2.355960 | -1.271452 |
| 11 | H  | -2.214264 | 1.162195  | -1.436649 |
| 12 | H  | -1.642260 | -1.867967 | 1.780033  |
| 13 | H  | -2.063619 | -1.180689 | 1.865397  |
| 14 | H  | 2.127179  | 1.990972  | -0.994017 |

Isomer Ni<sub>4</sub>S<sub>4</sub>@7H

|   |    |           |           |           |
|---|----|-----------|-----------|-----------|
| 1 | Ni | -0.846324 | -0.749791 | 0.805736  |
| 2 | S  | -1.150494 | -1.139684 | -1.388977 |
| 3 | Ni | 0.985820  | -0.892581 | -1.228418 |
| 4 | S  | 1.338333  | -1.187870 | 0.914003  |

|    |    |           |           |           |
|----|----|-----------|-----------|-----------|
| 5  | Ni | -0.805912 | 0.983712  | -1.327441 |
| 6  | S  | 1.360959  | 1.217733  | -2.046030 |
| 7  | Ni | 0.883912  | 0.897128  | 1.140188  |
| 8  | S  | -1.161550 | 1.459046  | 0.780554  |
| 9  | H  | 1.142220  | -2.348387 | -1.332427 |
| 10 | H  | -2.248483 | 1.189342  | -1.492811 |
| 11 | H  | -1.613316 | -2.000284 | 1.657655  |
| 12 | H  | -2.184104 | -1.420367 | 1.604828  |
| 13 | H  | 1.979717  | 1.861094  | -1.018460 |
| 14 | H  | 1.991888  | 2.013219  | 1.477528  |
| 15 | H  | 1.733223  | 1.697769  | 2.223901  |

Isomer Ni<sub>4</sub>S<sub>4</sub>@8H

|    |    |           |           |           |
|----|----|-----------|-----------|-----------|
| 1  | Ni | -0.971417 | -0.851842 | 0.803380  |
| 2  | S  | -1.137494 | -0.829255 | -1.372295 |
| 3  | Ni | 1.016079  | -0.965116 | -0.892026 |
| 4  | S  | 1.233443  | -1.175062 | 1.266120  |
| 5  | Ni | -1.045710 | 1.274907  | -0.700051 |
| 6  | S  | 1.229701  | 1.356569  | -1.440832 |
| 7  | Ni | 0.969219  | 0.917549  | 0.863084  |
| 8  | S  | -1.043584 | 1.323666  | 1.478944  |
| 9  | H  | -1.715237 | -2.161782 | 1.462803  |
| 10 | H  | -2.281658 | -1.548814 | 1.503510  |
| 11 | H  | 2.064783  | 2.048579  | -0.569161 |
| 12 | H  | 1.688859  | -1.692382 | -2.194647 |
| 13 | H  | 1.608372  | -2.299800 | -1.616826 |
| 14 | H  | -1.805977 | 2.158644  | -1.842480 |
| 15 | H  | -2.360030 | 2.072298  | -1.213251 |
| 16 | H  | 1.505134  | 1.343745  | 2.147920  |

Isomer Ni<sub>4</sub>S<sub>4</sub>@9H

|    |    |           |           |           |
|----|----|-----------|-----------|-----------|
| 1  | Ni | -0.964372 | -0.778663 | 1.042380  |
| 2  | S  | -0.743009 | -1.442449 | -1.036410 |
| 3  | Ni | 1.139999  | -0.658230 | -1.632937 |
| 4  | S  | 1.079401  | -1.124792 | 2.038490  |
| 5  | Ni | -0.777856 | 0.792640  | -1.011480 |
| 6  | S  | 1.337454  | 1.506272  | -1.507544 |
| 7  | Ni | 1.048902  | 0.660023  | 0.747650  |
| 8  | S  | -0.988609 | 1.424927  | 1.099454  |
| 9  | H  | -2.146341 | 1.383658  | -1.698423 |
| 10 | H  | -1.674798 | 1.162418  | -2.349621 |
| 11 | H  | -2.015802 | -1.863814 | 1.707010  |
| 12 | H  | -2.504633 | -1.250415 | 1.432153  |
| 13 | H  | 1.853099  | 1.436841  | 1.681297  |
| 14 | H  | 1.983983  | 1.727025  | -0.208925 |
| 15 | H  | 2.053118  | -1.910535 | -2.017677 |

|    |   |          |           |           |
|----|---|----------|-----------|-----------|
| 16 | H | 2.491703 | -1.224304 | -2.287148 |
| 17 | H | 1.578507 | -2.046663 | 1.168109  |

Isomer Ni<sub>4</sub>S<sub>4</sub>@10H

|    |    |           |           |           |
|----|----|-----------|-----------|-----------|
| 1  | Ni | -0.851118 | -0.948567 | 1.227196  |
| 2  | S  | -1.357806 | -1.306290 | -1.018347 |
| 3  | Ni | 0.910293  | -0.880246 | -0.727421 |
| 4  | S  | 1.237626  | -1.276935 | 1.443190  |
| 5  | Ni | -0.995721 | 0.889833  | -0.663356 |
| 6  | S  | 1.151378  | 1.343371  | -1.216165 |
| 7  | Ni | 0.995322  | 0.926775  | 1.218402  |
| 8  | S  | -1.282949 | 1.378739  | 1.533547  |
| 9  | H  | -1.784262 | 0.191421  | 2.204379  |
| 10 | H  | -1.046587 | -1.875214 | 2.349525  |
| 11 | H  | 1.608430  | 2.071845  | 2.149568  |
| 12 | H  | 1.842657  | 1.326288  | 2.507307  |
| 13 | H  | 1.634720  | -2.149519 | -1.383632 |
| 14 | H  | 2.139499  | -1.487940 | -1.559663 |
| 15 | H  | -2.194648 | 1.465574  | -1.582634 |
| 16 | H  | -1.610675 | 2.073186  | -1.581195 |
| 17 | H  | -1.754412 | -1.974058 | 0.264534  |
| 18 | H  | 1.843376  | 1.796617  | -0.029034 |

Isomer Ni<sub>4</sub>S<sub>4</sub>@11H

|    |    |           |           |           |
|----|----|-----------|-----------|-----------|
| 1  | Ni | -0.838553 | -0.846287 | 0.966086  |
| 2  | S  | -1.184096 | -1.377168 | -1.115160 |
| 3  | Ni | 0.985271  | -0.963638 | -0.963864 |
| 4  | S  | 1.395276  | -1.198315 | 1.397686  |
| 5  | Ni | -0.863092 | 0.809150  | -1.093224 |
| 6  | S  | 1.362215  | 1.274426  | -1.195270 |
| 7  | Ni | 0.943375  | 0.979147  | 1.204152  |
| 8  | S  | -1.255738 | 1.385491  | 1.254328  |
| 9  | H  | 2.102857  | -1.606275 | 0.196695  |
| 10 | H  | 1.845896  | 1.852372  | 0.056861  |
| 11 | H  | -1.540111 | 2.008450  | -0.016683 |
| 12 | H  | -1.461058 | -1.387779 | 2.360791  |
| 13 | H  | -1.762408 | -1.901396 | 1.754194  |
| 14 | H  | 1.551111  | -2.106462 | -1.936256 |
| 15 | H  | 1.496652  | -1.401620 | -2.420192 |
| 16 | H  | 1.262838  | 1.400757  | 2.710873  |
| 17 | H  | 1.765491  | 1.908748  | 2.236635  |
| 18 | H  | -1.274457 | 1.301780  | -2.558556 |
| 19 | H  | -2.009994 | 1.236493  | -2.120586 |

Isomer Ni<sub>4</sub>S<sub>4</sub>@12H

|   |    |           |           |          |
|---|----|-----------|-----------|----------|
| 1 | Ni | -0.886123 | -0.877549 | 1.068691 |
|---|----|-----------|-----------|----------|

|    |    |           |           |           |
|----|----|-----------|-----------|-----------|
| 2  | S  | -1.114536 | -1.306333 | -1.231821 |
| 3  | Ni | 1.086494  | -0.873963 | -0.924618 |
| 4  | S  | 1.331845  | -1.216126 | 1.396727  |
| 5  | Ni | -0.769421 | 0.923394  | -1.084611 |
| 6  | S  | 1.452600  | 1.356377  | -1.065657 |
| 7  | Ni | 0.893131  | 0.991813  | 1.204774  |
| 8  | S  | -1.338342 | 1.339093  | 1.166259  |
| 9  | H  | 1.913904  | 1.892033  | 0.236580  |
| 10 | H  | -1.737315 | -1.835579 | 0.001103  |
| 11 | H  | -1.791456 | 1.853075  | -0.142329 |
| 12 | H  | 2.028091  | -1.695445 | 0.179704  |
| 13 | H  | -0.949020 | 1.249784  | -2.651606 |
| 14 | H  | -1.588810 | 1.658143  | -2.265539 |
| 15 | H  | -1.289287 | -1.200007 | 2.596877  |
| 16 | H  | -1.793370 | -1.696861 | 2.119431  |
| 17 | H  | 1.923973  | -1.809784 | -1.948460 |
| 18 | H  | 1.549689  | -1.219495 | -2.434780 |
| 19 | H  | 1.088520  | 1.325772  | 2.772652  |
| 20 | H  | 1.589704  | 1.880712  | 2.362378  |

Isomer Ni<sub>4</sub>S<sub>4</sub>@13H

|    |    |           |           |           |
|----|----|-----------|-----------|-----------|
| 1  | Ni | -1.456973 | -0.930011 | 0.609353  |
| 2  | S  | -0.530189 | -1.122861 | -1.155924 |
| 3  | Ni | 1.162817  | -0.617888 | -1.170295 |
| 4  | S  | 1.758712  | -0.754117 | 0.769008  |
| 5  | Ni | -0.578674 | 1.246094  | -0.850140 |
| 6  | S  | 1.652236  | 1.599228  | -1.022557 |
| 7  | Ni | 1.122606  | 0.730645  | 0.910293  |
| 8  | S  | -1.762046 | 1.076330  | 0.690381  |
| 9  | H  | -1.461969 | 2.083111  | 1.727440  |
| 10 | H  | 1.421898  | -2.239605 | 1.240758  |
| 11 | H  | -1.301745 | -0.850435 | 2.309855  |
| 12 | H  | 1.099959  | 1.049002  | 2.466139  |
| 13 | H  | 0.474592  | 2.502334  | -1.223485 |
| 14 | H  | 1.576469  | -0.896432 | -2.755836 |
| 15 | H  | 2.073719  | -1.398405 | -2.322586 |
| 16 | H  | -1.031353 | 1.135416  | -2.282907 |
| 17 | H  | 0.942307  | 1.760772  | 2.027024  |
| 18 | H  | -1.755872 | 1.396149  | -2.041294 |
| 19 | H  | -1.159241 | -1.620470 | 1.930495  |
| 20 | H  | -0.504512 | -2.479220 | -1.040164 |
| 21 | H  | -1.619758 | -1.751164 | -1.876065 |

Isomer Ni<sub>4</sub>S<sub>4</sub>@14H

|   |    |           |           |          |
|---|----|-----------|-----------|----------|
| 1 | Ni | -0.887430 | -1.279998 | 1.254224 |
|---|----|-----------|-----------|----------|

|    |    |           |           |           |
|----|----|-----------|-----------|-----------|
| 2  | S  | -1.073119 | -1.123743 | -0.931041 |
| 3  | Ni | 0.584695  | -0.883720 | -1.307214 |
| 4  | S  | 1.574559  | -1.936560 | 1.661910  |
| 5  | Ni | -1.231521 | 1.302696  | -0.366138 |
| 6  | S  | 1.785364  | 1.440809  | -0.859344 |
| 7  | Ni | 0.964625  | 0.807677  | 1.171794  |
| 8  | S  | -1.168438 | 1.172299  | 1.715579  |
| 9  | H  | -2.316258 | 1.968177  | 0.124283  |
| 10 | H  | 2.000594  | -1.901829 | 0.744649  |
| 11 | H  | -2.243958 | -1.539903 | 1.997147  |
| 12 | H  | -1.565996 | -2.188737 | 2.153961  |
| 13 | H  | 2.069951  | 1.497736  | 2.211202  |
| 14 | H  | 1.564453  | 2.120670  | 2.003936  |
| 15 | H  | 1.690201  | -1.348075 | -1.704284 |
| 16 | H  | 1.343913  | -1.052834 | -2.413837 |
| 17 | H  | -1.606474 | 1.730431  | -1.787270 |
| 18 | H  | -0.949861 | 1.046113  | -1.887296 |
| 19 | H  | 2.893789  | 1.306235  | -1.681533 |
| 20 | H  | 1.340684  | 2.505912  | -1.592671 |
| 21 | H  | -0.864061 | -2.193488 | -1.493518 |
| 22 | H  | -2.188781 | -1.469642 | -1.817257 |

Isomer Ni<sub>4</sub>S<sub>4</sub>@15H

|    |    |           |           |           |
|----|----|-----------|-----------|-----------|
| 1  | Ni | -0.806824 | -0.403459 | 1.176482  |
| 2  | S  | -1.307147 | -0.833833 | -0.785346 |
| 3  | Ni | 1.067204  | -0.829822 | -1.046421 |
| 4  | S  | 1.052930  | -1.074137 | 0.758075  |
| 5  | Ni | -1.369171 | 0.767217  | -0.942267 |
| 6  | S  | 1.685512  | 1.266850  | -1.474371 |
| 7  | Ni | 0.765888  | 1.511156  | 0.400304  |
| 8  | S  | -1.363092 | 1.837685  | 0.990086  |
| 9  | H  | -1.410368 | 1.850598  | -1.992158 |
| 10 | H  | -2.221637 | 1.621634  | -1.845566 |
| 11 | H  | 1.725432  | -1.446157 | -1.922225 |
| 12 | H  | 2.332408  | -1.321214 | -1.364281 |
| 13 | H  | 3.005653  | 1.589858  | -1.687784 |
| 14 | H  | 1.334462  | 1.857046  | -2.664355 |
| 15 | H  | -1.582298 | -2.305195 | -1.424418 |
| 16 | H  | -1.527595 | -1.127939 | -2.171423 |
| 17 | H  | 1.139780  | -2.272938 | 1.142004  |
| 18 | H  | 2.170892  | -1.054816 | 1.853161  |
| 19 | H  | -1.402570 | 0.939713  | 2.153311  |
| 20 | H  | 1.382914  | 1.640875  | 1.875348  |
| 21 | H  | 2.058884  | 1.703168  | 1.338768  |
| 22 | H  | -2.245642 | -1.083965 | 1.121251  |
| 23 | H  | -1.806137 | -1.521502 | 1.732127  |

Isomer Ni<sub>4</sub>S<sub>4</sub>@16H

|    |    |           |           |           |
|----|----|-----------|-----------|-----------|
| 1  | Ni | -0.713323 | -1.401081 | 0.815274  |
| 2  | S  | -1.296877 | -1.416693 | -1.286081 |
| 3  | Ni | 0.860804  | -0.777518 | -0.942796 |
| 4  | S  | 1.331764  | -1.165339 | 1.405996  |
| 5  | Ni | -0.918315 | 0.934057  | -0.391323 |
| 6  | S  | 1.326164  | 1.431697  | -1.346024 |
| 7  | Ni | 1.459109  | 0.873933  | 0.753169  |
| 8  | S  | -1.415915 | 1.498536  | 1.662574  |
| 9  | H  | 1.298125  | 2.822600  | -1.313665 |
| 10 | H  | 2.654509  | 1.508387  | -1.739309 |
| 11 | H  | -2.685826 | -1.427200 | -1.237454 |
| 12 | H  | -1.330744 | -2.775118 | -1.570104 |
| 13 | H  | -1.449013 | 2.873010  | 1.689115  |
| 14 | H  | -2.790669 | 1.492301  | 1.707425  |
| 15 | H  | 2.313327  | -2.081331 | 1.110342  |
| 16 | H  | 1.596186  | -1.374286 | 2.761949  |
| 17 | H  | 1.704854  | 1.639700  | 2.106768  |
| 18 | H  | 1.633875  | 2.260211  | 1.471951  |
| 19 | H  | 2.104040  | -1.310775 | -1.699175 |
| 20 | H  | 1.485761  | -1.979800 | -1.695987 |
| 21 | H  | -2.073547 | -1.528092 | 1.584345  |
| 22 | H  | -1.428238 | -1.590723 | 2.198523  |
| 23 | H  | -1.444705 | 1.322909  | -1.837131 |
| 24 | H  | -1.879276 | 1.833988  | -1.255006 |
